# Supplementary material for: Fibroblast Growth Factors and Vascular Endothelial Growth Factor Promote Cardiac Reprogramming under Defined Conditions
Source: PubMed Central journal article supplement — Stem Cell Reports. 2015 Nov 25;5(6):1128–42. doi: 10.1016/j.stemcr.2015.10.019 (PMC4682292; doi:10.1016/j.stemcr.2015.10.019), 2015-11-25
Supplement: mmc1.pdf [file mmc1.pdf]

**Stem Cell Reports, Volume 5**

**Supplemental Information**

# **Fibroblast Growth Factors and Vascular Endothelial Growth Factor Promote Cardiac Reprogramming under Defined Conditions**

**Hiroyuki Yamakawa, Naoto Muraoka, Kazutaka Miyamoto, Taketaro Sadahiro, Mari Isomi, Sho Haginiwa, Hidenori Kojima, Tomohiko Umei, Mizuha Akiyama, Yuki Kuishi, Junko Kurokawa, Tetsushi Furukawa, Keiichi Fukuda, and Masaki Ieda**

# Supplementary Figure 1

**A**

Number of beating cells

|              |   | FGF2 [ng/mL] |   |    |    |
|--------------|---|--------------|---|----|----|
|              |   | 0            | 1 | 10 | 50 |
| VEGF [ng/mL] | 0 | 0            | 0 | 1  | 0  |
|              | 1 | 0            | 1 | 4  | 3  |
|              | 5 | 1            | 1 | 5  | 5  |

**B**

Number of beating cells

|                |               | FGF10 [ng/mL] |   |    |     |
|----------------|---------------|---------------|---|----|-----|
|                |               | 0             | 1 | 25 | 100 |
| FGF2 [10ng/mL] | VEGF [5ng/mL] | 4             | 3 | 32 | 18  |
| FGF2 [50ng/mL] | VEGF [5ng/mL] | 3             | 1 | 24 | 27  |

**C**

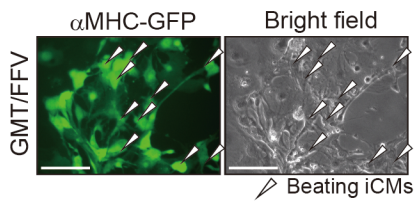

**D**

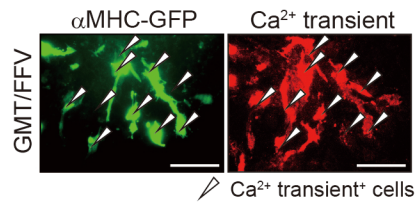

**E**

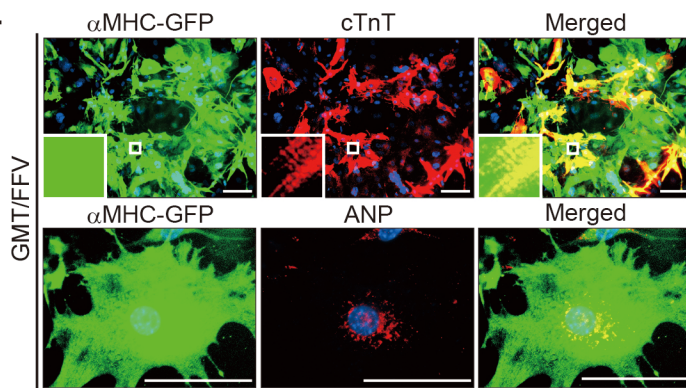

# Supplementary Figure 2

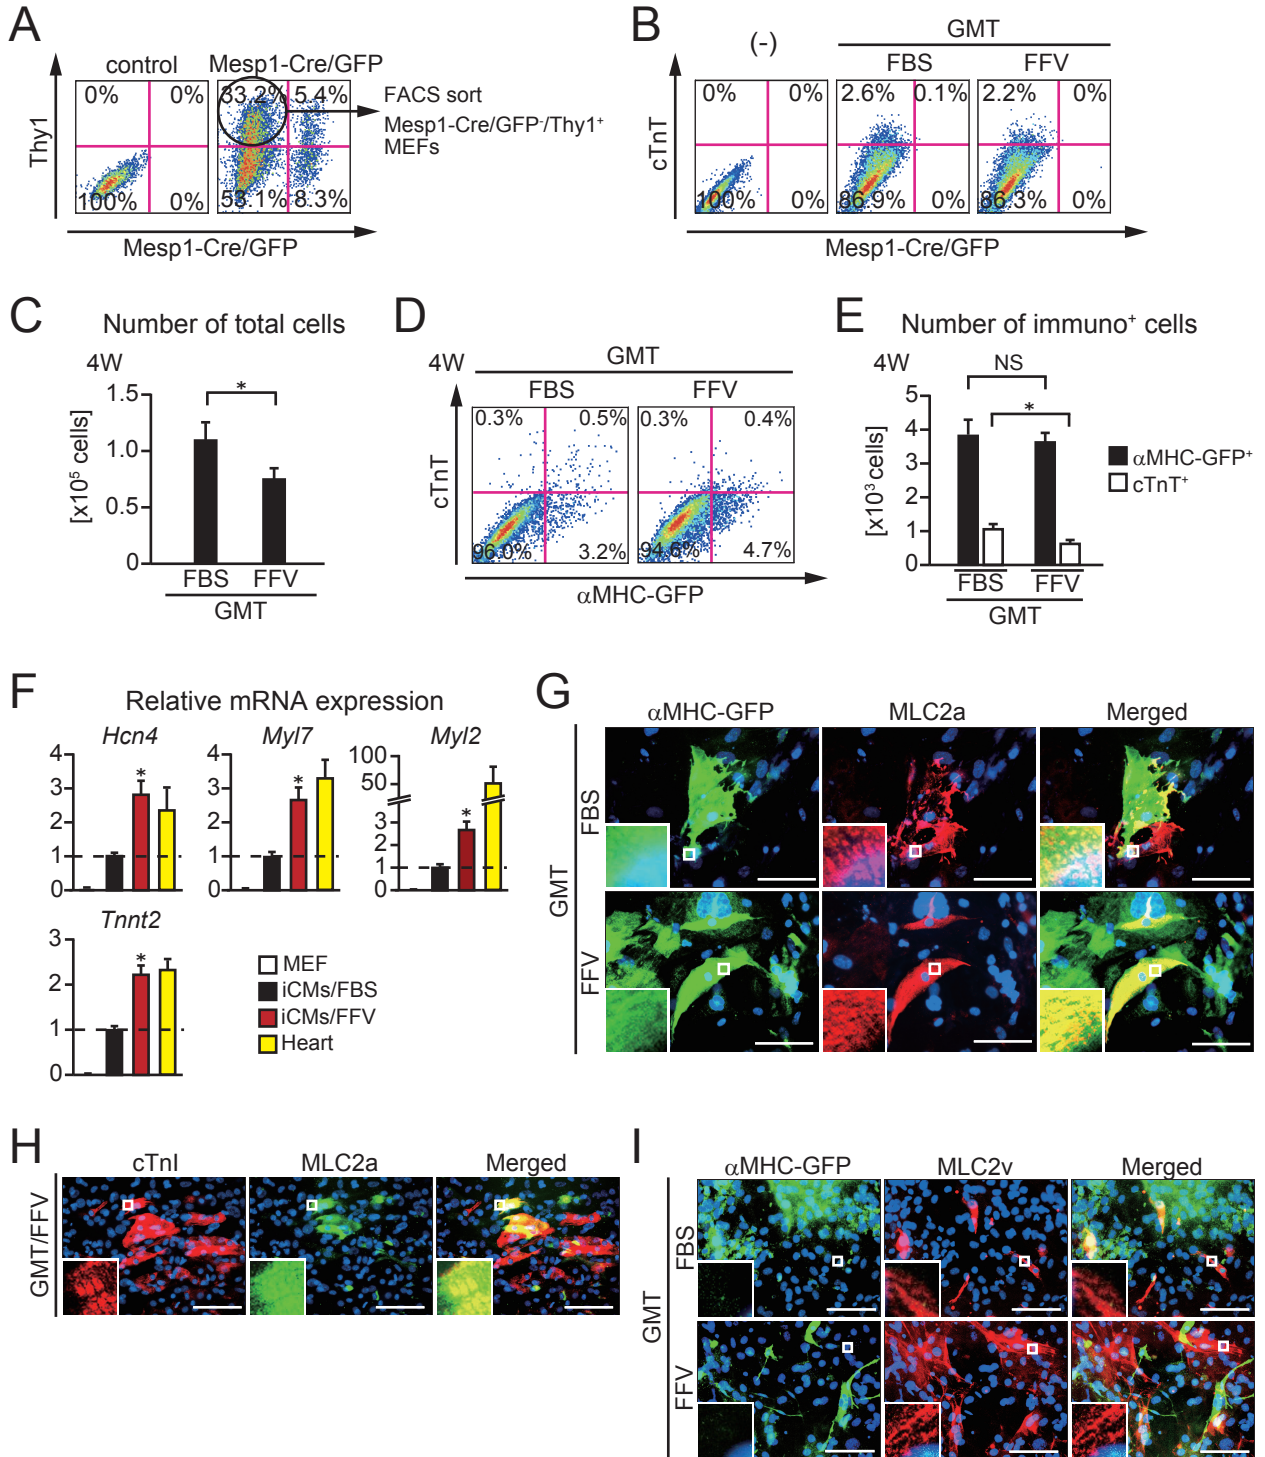

# Supplementary Figure 3

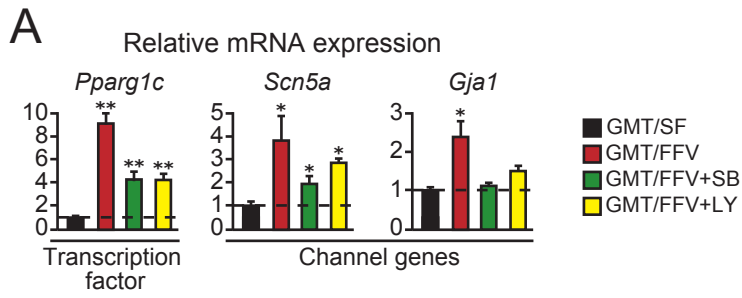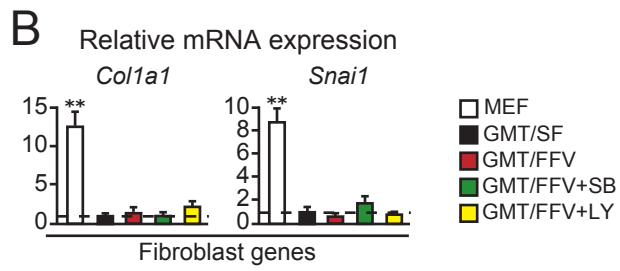

# Supplementary Figure 4

**A**

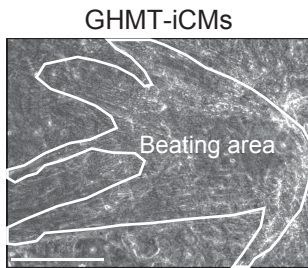

**B**

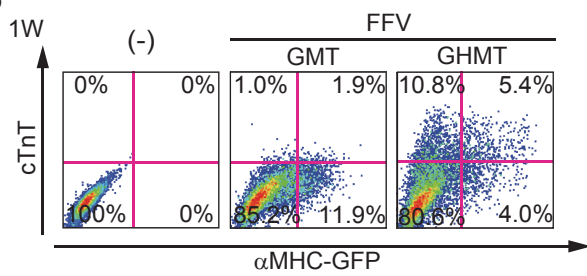

**C**

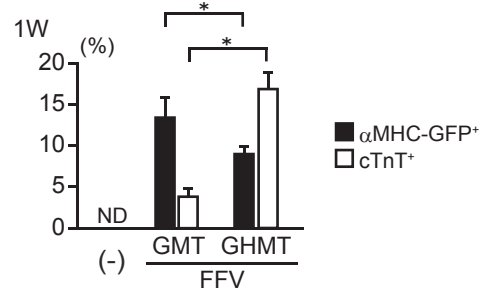

**D**

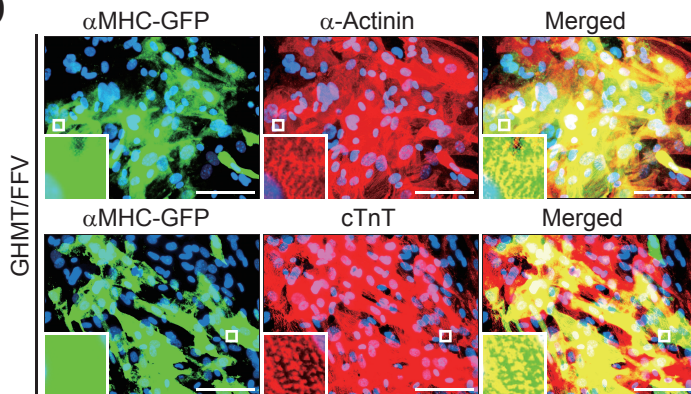

**E**

GO terms including "heart" or "cardiac" enriched in GMTMM-iCMs/FFV upregulated genes

| GO term                                           | Genes | Size | p-value |
|---------------------------------------------------|-------|------|---------|
| Ventricular cardiac muscle tissue morphogenesis   | 9     | 25   | 3.2E-8  |
| Cardiac myofibril assembly                        | 5     | 7    | 5.5E-7  |
| Heart development                                 | 17    | 151  | 4.5E-6  |
| Cardiac muscle cell proliferation                 | 5     | 11   | 1.1E-5  |
| Cardiac muscle contraction                        | 6     | 23   | 5.4E-5  |
| Heart morphogenesis                               | 7     | 42   | 0.00027 |
| Adult heart development                           | 4     | 13   | 0.00051 |
| Cardiac muscle tissue morphogenesis               | 3     | 7    | 0.00093 |
| Regulation of the force of heart contraction      | 4     | 18   | 0.0019  |
| Cardiac left ventricle morphogenesis              | 2     | 4    | 0.0055  |
| Positive regulation of cardiac muscle hypertrophy | 2     | 4    | 0.0055  |
| Regulation of cardiac muscle contraction          | 2     | 5    | 0.0089  |
| Negative regulation of heart rate                 | 2     | 5    | 0.0089  |
| Atrial cardiac muscle tissue morphogenesis        | 2     | 5    | 0.0089  |

## Supplemental Information

### Supplemental Figure Legends

#### Figure S1. GMT-transduced cells expressed several cardiac markers in FFV culture

(A, B) Dose dependency of FFV-mediated cardiac reprogramming with GMT transduction. The number of beating cells in each well is shown.

(C) Spontaneously beating GMT-iCMs cultured with FFV for 4 weeks (arrowheads), corresponding to **Movie S2**.

(D) Spontaneous  $\text{Ca}^{2+}$  oscillations observed in GMT-iCMs (arrowheads) after 4 weeks of FFV treatment.

(E) Immunocytochemistry for  $\alpha\text{MHC-GFP}$ , cTNT, ANP, and DAPI. GMT-iCMs treated with FFV express cardiac proteins. Insets indicate high-magnification. Scale bars represent 100  $\mu\text{m}$ .

#### Figure S2. FFV treatment promoted cardiac reprogramming without stimulating cell proliferation

(A, B) *Mesp1-GFP*<sup>-</sup>/*Thy1*<sup>+</sup> MEFs were sorted (A), transduced with GMT, and cultured with FBS or FFV. All cTNT<sup>+</sup> cells were negative for *Mesp1-GFP* (B).

(C-E) The total number of cells in each well was counted after 4 weeks (C) (n = 3 independent triplicate experiments). FACS analysis of  $\alpha\text{MHC-GFP}^+$  and cTNT<sup>+</sup> cells 4 weeks after GMT transduction and culture with FBS or FFV (D). The number of  $\alpha\text{MHC-GFP}^+$  and cTNT<sup>+</sup> cells in each well was calculated as the total number of cells times the percentage of cardiac marker<sup>+</sup> cells, and quantitative data are shown in (E) (n = 3 independent triplicate experiments).

(F) Relative mRNA expression of *Hcn4*, *Myl7*, *Myl2*, and *TnnT2* in MEFs, iCMs with FBS or FFV, and postnatal hearts (n = 3 independent triplicate experiments).

(G-I) Immunocytochemistry for  $\alpha\text{MHC-GFP}$ , MLC2a, cTNI, MLC2v, and DAPI in iCMs cultured with FBS or FFV for 4 weeks. Quantitative data are shown in **Figure 2I**.

All data are presented as mean  $\pm$  SD. \*, P < 0.05 vs. the relevant control. NS, not significant. Scale bars represent 100  $\mu\text{m}$ .

**Figure S3. FFV induced cardiac gene expression through p38MAPK and PI3K/AKT pathways**

(A, B) Relative mRNA expression of the indicated genes in MEFs (white bars) and GMT-transduced cells cultured with SF (black bars), FFV without inhibitors (red bars), or FFV with SB203580 (green bars) or LY294002 (yellow bars) was determined by qRT-PCR after 4 weeks (n = 3 independent triplicate experiments). Note that FFV did not alter fibroblast gene expression (B). Data were normalized to the values of GMT-transduced cells in SF. See also **Figure 3F**.

All data are presented as mean  $\pm$  SD. \*, P < 0.05 vs. the relevant control.

**Figure S4. Hand2 increased cardiac marker expressing cells at early stage of reprogramming**

(A) Spontaneously beating GHMT-iCMs cultured with FFV for 17 weeks, corresponding to **Movie S5**. The iCMs beat like contractile sheets (white line).

(B, C) FACS analysis of  $\alpha$ MHC-GFP<sup>+</sup> and cTNT<sup>+</sup> cells 1 week after GMT or GHMT transduction with FFV. Quantitative data are shown in panel (C) (n = 6 independent triplicate experiments).

(D) Immunocytochemistry for  $\alpha$ MHC-GFP,  $\alpha$ -actinin, cTNT, and DAPI. GHMT transduction induced cardiac protein expression 4 weeks after transduction. High-magnification views in insets show sarcomeric organization.

(E) GO terms including “heart” or “cardiac” in the upregulated genes in GMTMM-iCMs cultured with FFV. See also **Figure 5H**.

All data are presented as mean  $\pm$  SD. \*\*, P < 0.01; \*, P < 0.05 vs. the relevant control. Scale bars represent 100  $\mu$ m.

**Movie S1.**

Spontaneously beating GMT-iCMs cultured with FFV for 4 weeks, corresponding to **Figure 1E**.

**Movie S2.**

Spontaneously beating GMT-iCMs cultured with FFV for 4 weeks, corresponding to **Figure S1C**.

**Movie S3.**

Spontaneous  $\text{Ca}^{2+}$  oscillations in GMT-iCMs cultured with FFV for 4 weeks, corresponding to **Figure 1G**.

**Movie S4.**

Spontaneously beating MT-iCMs cultured with FFV for 4 weeks, corresponding to **Figure 4D**.

**Movie S5.**

Spontaneously beating GHMT-iCMs cultured with FFV for 17 weeks, corresponding to **Figure S4A**.

Cells are beating as contractile sheets.

**Movie S6.**

Spontaneously beating GMTMM-iCMs derived from TTFs cultured with FFV for 8 weeks, corresponding to **Figure 5D**.
